# Supplementary material
Source: MDPI journal article supplement (https://www.mdpi.com/2079-6412/13/3/599)
Supplement: s1 [file s1]

Archive with 1 entries (1 files):
- coatings-2244782-supplementary.pdf
